# Supplementary material
Source: publisher figshare collection journal article supplement (https://gsapubs.figshare.com/ndownloader/files/23306954)
Supplement: Supplementary file 1 [file 23306954]

# Identifying externally-derived sulfur in conduit-type Cu-PGE deposits: the importance of multiple sulfur isotope studies

Shahabi Far et al.

## **Geology**

The Proterozoic Coldwell alkaline complex (Fig. DR1) is a large, unmetamorphosed, undeformed composite intrusive body (Walker et al., 1993) emplaced at  $1108 \pm 1$  Ma (Heaman and Machado, 1992). It is associated with the Mid-Continent Rift System and was emplaced into Archean metavolcanic, metasedimentary, and granitic plutonic rocks.

At the Marathon deposit, at least three distinct intrusive series have been recognized on the basis of cross-cutting relationships, geochemistry, and petrographic characteristics (Good et al., 2015). The three series are: 1) metabasalt, 2) Layered Series, and 3) Marathon Series, all of which comprise the Eastern Gabbro (Figs. DR1 and DR2). The Two Duck Lake gabbro (TDLG) belongs to the Marathon Series, and is the principal host to the Marathon mineralization. It intruded the Layered Series, metabasalt, and footwall rocks, which, in the vicinity of the Marathon deposit, comprise Archean intermediate pyroclastic metavolcanic rocks.

## **Sample selection**

Nine samples from the three mineralized zones at Marathon, and 2 samples of Archean country rocks were selected for in situ secondary ion mass spectrometry (SIMS) for  $\delta^{34}\text{S}$ . In addition, nine samples from the three mineralized zones at Marathon were selected for sulfide mineral separation and measurements of  $\Delta^{33}\text{S}$  and  $\Delta^{36}\text{S}$  (Shahabi Far, 2016).

## Secondary ion mass spectroscopy (SIMS)

One-inch diameter polished mounts from small slabs of selected sulfide-bearing rocks were prepared, and all samples were sputter-coated with Au. The sulfur isotope analyses were performed using the Cameca IMS 4f Secondary Ion Mass Spectrometer at the MAF-IIC Microanalysis Facility of Memorial University, St. John's, Newfoundland. The analyses were conducted by bombarding the sample with a  $\text{Cs}^+$  primary-ion microbeam of 800 to 1200 pA, with an accelerating potential of 10 KeV, focused into a 5 to 15  $\mu\text{m}$  diameter spot. The surface gold coating was locally penetrated by pre-sputtering for 180 s with a 25  $\mu\text{m}$  square raster. To improve the homogeneity of primary-ion delivery, a smaller square raster (5 to 15  $\mu\text{m}$ ) was also applied to the beam during analysis. The accelerating voltage of negatively-charged secondary ions into the mass spectrometer was 4.5 KeV. Using the simple 150  $\mu\text{m}$  transfer lens mode with a field aperture of 1800  $\mu\text{m}$ , resulted in a 125  $\mu\text{m}$  field of view in the mass spectrometer. Cyclical magnetic peak switching was used to obtain signals for  $^{32}\text{S}^-$ ,  $^{34}\text{S}^-$ , and a background position at 31.67 Da, with counting times of 2 s, 6 s and 0.5 s, respectively. For magnet settling between each peak counting position, a waiting time of 0.25 s was included. An ETP 133H multiple-dynode electron multiplier and ECL-based pulse-counting electronics with an overall dead time of 12 ns were used for collecting and processing all signals. Background measurements at mass 31.67 Da were routinely less than 0.05 to 0.1 counts per second. Primary-beam currents were adjusted appropriately for each sulfide phase to maintain count rates on  $^{32}\text{S}^-$  between 800,000 and 1,100,000 counts per second. The magnitude of instrumental mass fractionation (IMF) is not constant for all sulfide minerals. Therefore, measured  $^{34}\text{S}/^{32}\text{S}$  ratios were corrected for IMF by comparison to replicates of mineral-specific reference materials; UL9B (pyrite;  $\delta^{34}\text{S}$ : +16.4‰), PoW1 (pyrrhotite;  $\delta^{34}\text{S}$ : +3.0‰) and Norilsk (chalcopyrite;  $\delta^{34}\text{S}$ :

+8.4‰). The accepted values for these reference materials listed here were determined by analysis of replicate aliquots at McGill University (using the approach described below) providing a common reference for comparison of SIMS and isotope ratio mass spectroscopy (IRMS) determinations of  $\delta^{34}\text{S}$  in this study. All sulfur isotope data are reported relative to Vienna Cañon Diablo Troilite (V-CDT). Analyses produced internal precisions on  $\delta^{34}\text{S}$  of typically better than  $\pm 0.2$  ‰ ( $1\sigma$ ) and overall reproducibility was typically better than  $\pm 0.35$  to  $0.40$  ‰ ( $1\sigma$ ).

### **Isotope ratio mass spectroscopy (IRMS)**

Selected samples for this study crushed, and sieved to liberate chalcopyrite and pyrrhotite from each other and from silicate, oxide, and other sulfide minerals. Then, chalcopyrite and pyrrhotite were separated from each sample by handpicking under a binocular microscope. The sulfur isotopic composition of these samples was measured at the Department of Earth and Planetary Sciences, McGill University. All samples were pulverized and reacted with a Cr-reducing solution at approximately  $85^\circ\text{C}$  to liberate sulfur from sulfide minerals as  $\text{H}_2\text{S}$ . The  $\text{H}_2\text{S}$  was then trapped using a 4% (w/w) zinc acetate solution and reacted with  $\text{AgNO}_3$  solution (0.1 N) to produce  $\text{Ag}_2\text{S}$ , which was subsequently filtered and rinsed multiple times with  $\text{NH}_4\text{OH}$  solution (1N) and Milli-Q water and dried in an oven at  $70^\circ\text{C}$  (cf. Ono et al., 2006). This  $\text{Ag}_2\text{S}$  was fluorinated in a nickel reaction vessel at approximately  $250^\circ\text{C}$  under excess  $\text{F}_2$  to produce  $\text{SF}_6$ . The  $\text{SF}_6$  was purified cryogenically and chromatographically, and analyzed using a ThermoFinnigan MAT 253 dual-inlet gas-source mass spectrometer. All sulfur isotope data are reported relative to Vienna Cañon Diablo Troilite (V-CDT). The precision of analyses ( $1\sigma$ ) is better than  $0.05$ ‰ for  $\delta^{34}\text{S}$  values,  $0.01$ ‰ for  $\Delta^{33}\text{S}$  values, and  $0.1$ ‰ for  $\Delta^{36}\text{S}$  values. Uncertainties in the measurements ( $1\sigma$ ) based on analytical reproducibility are better than  $0.1$ ‰,

0.01‰, and 0.2‰ for  $\delta^{34}\text{S}$ ,  $\Delta^{33}\text{S}$ , and  $\Delta^{36}\text{S}$  values, respectively.

### **Whole rock data**

Whole rock assay data for the ore metals were obtained from Stillwater Canada Inc. The analyses were conducted by ALS Labs using atomic absorption spectroscopy (AAS) for copper, and fire-assay followed by ICP-atomic emission spectroscopy (ICP-AES) for Au, Pt, and Pd. The estimated accuracy and precision of the analyses are, respectively, better than 16 and 10% for Au, 16 and 13% for Pt, 8 and 6% for Pd, and 4% and 3% for Cu.

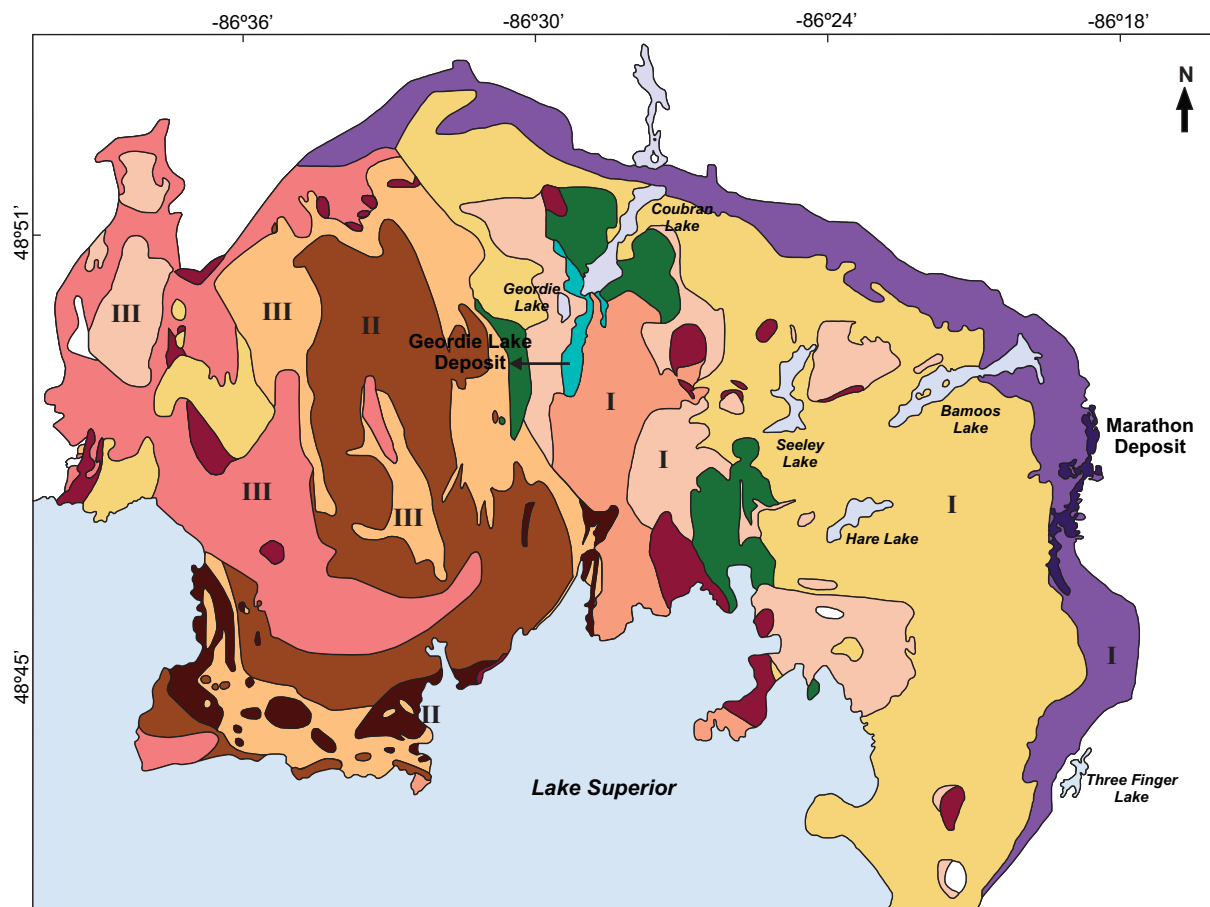

| Gabbroic Rocks         | Syenitic Rocks                          | Volcanic Rocks                                         |
|------------------------|-----------------------------------------|--------------------------------------------------------|
| Two Duck Lake Gabbro   | Iron-Rich Augite Syenite                | Archean Metavolcanics                                  |
| Eastern Gabbro Suite   | Amphibole Syenite                       | Mafic Volcanic, Subvolcanic, and Hypabyssal Intrusives |
| Geordie Lake Intrusion | Amphibole Quartz Syenite                |                                                        |
| Western Gabbro Series  | Recrystallized Amphibole Quartz Syenite |                                                        |
| Alkaline Gabbro Series | Nepheline Syenite                       |                                                        |
|                        | Amphibole Natrolite-Nepheline Syenite   |                                                        |

**Figure DR1:** Geology map of the Coldwell Complex showing the Eastern Gabbro, the syenitic rocks and the location of the Marathon deposit (modified after Good et al., 2015). The intrusive centers have been shown by Roman numerals (after Mulja and Mitchell, 1991).

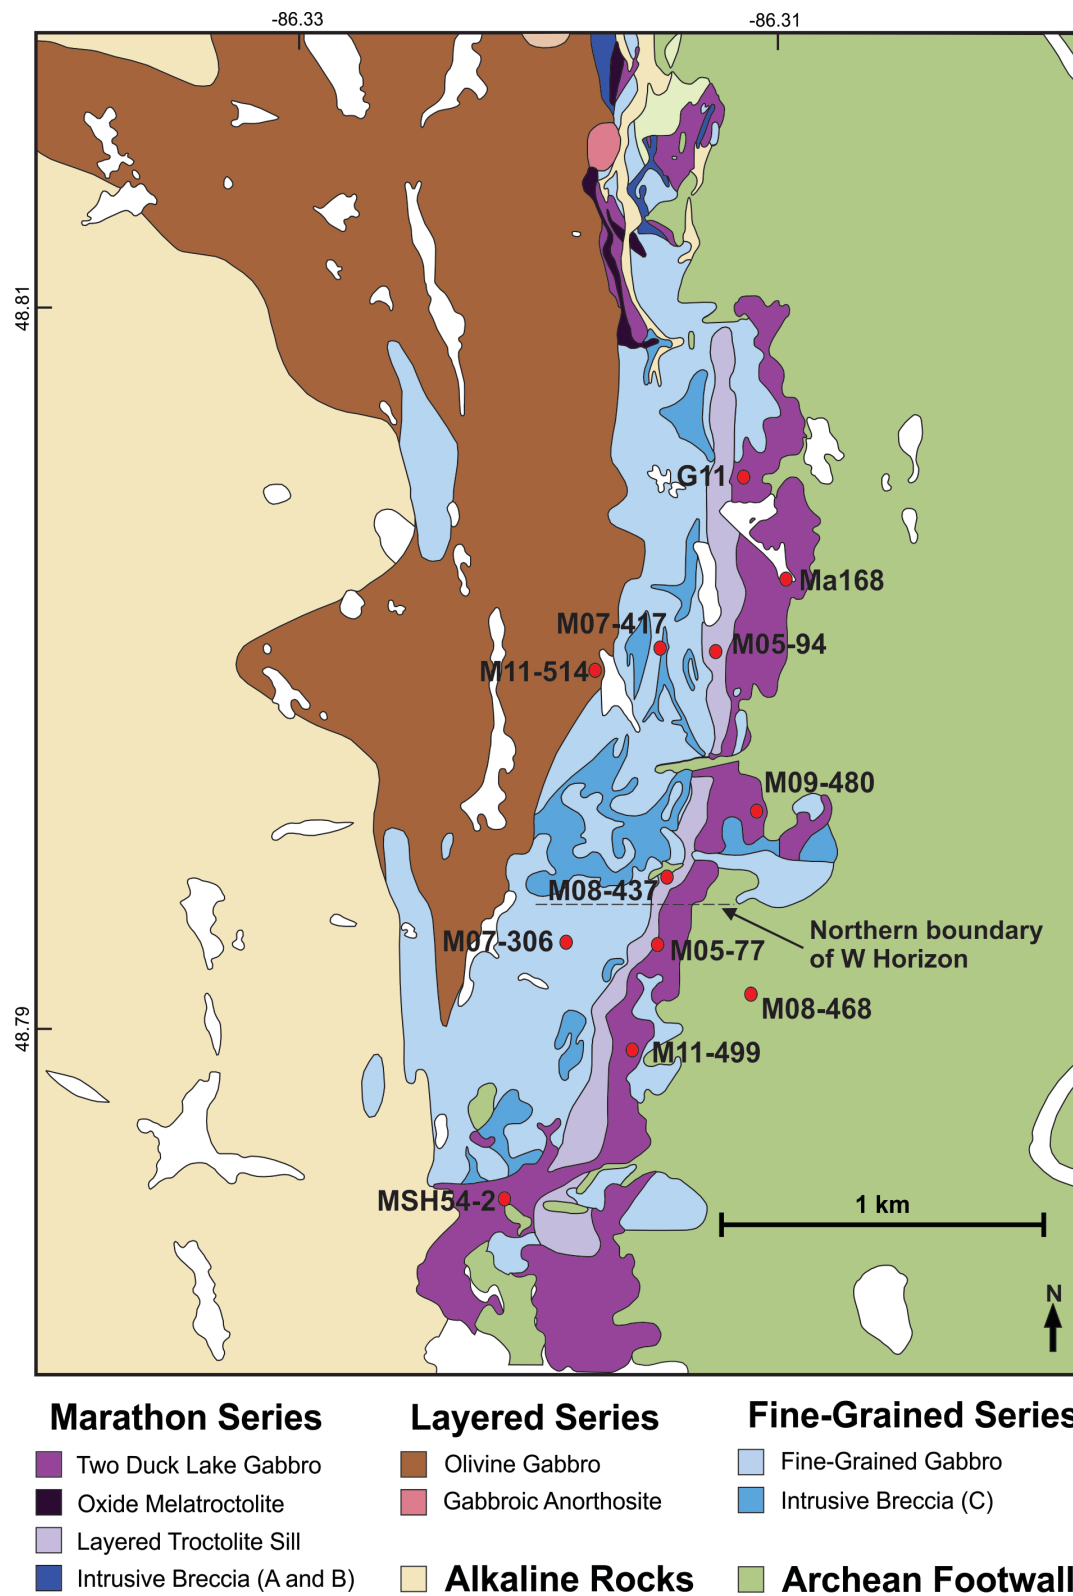

**Figure DR2:** Geology map of the Marathon deposit showing the relationship of the TDLG with other gabbros and Archean country rocks (modified after Good et al., 2015). Red circles show the location of the samples.

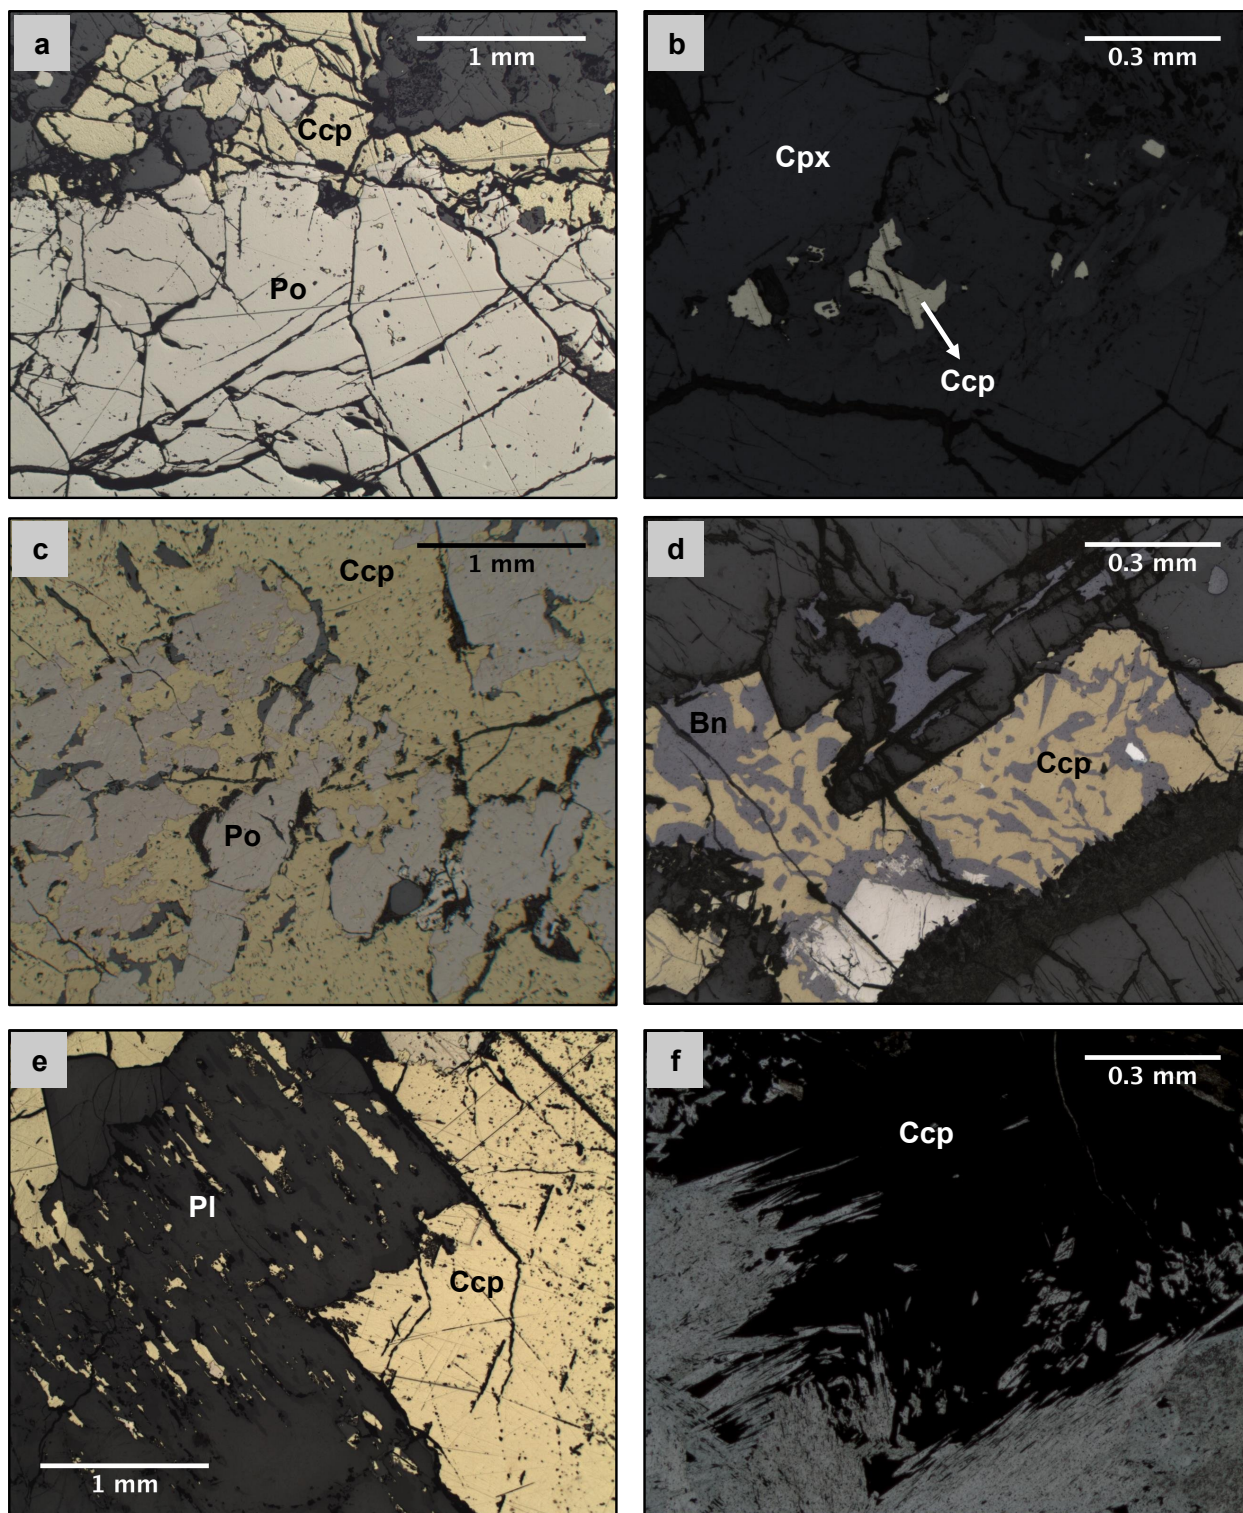

**Figure DR3:** Photomicrographs representing different sulfide occurrence and assemblages in the Marathon deposit. a) massive sulfide from the Footwall Zone, b) disseminated chalcopyrite, c) chalcopyrite replacing primary magmatic pyrrhotite, d) Bornite blebs and lamellae within chalcopyrite, e) Chalcopyrite blebs within resorption rim of plagioclase crystal, and f) Chalcopyrite intergrown with hydrous minerals.



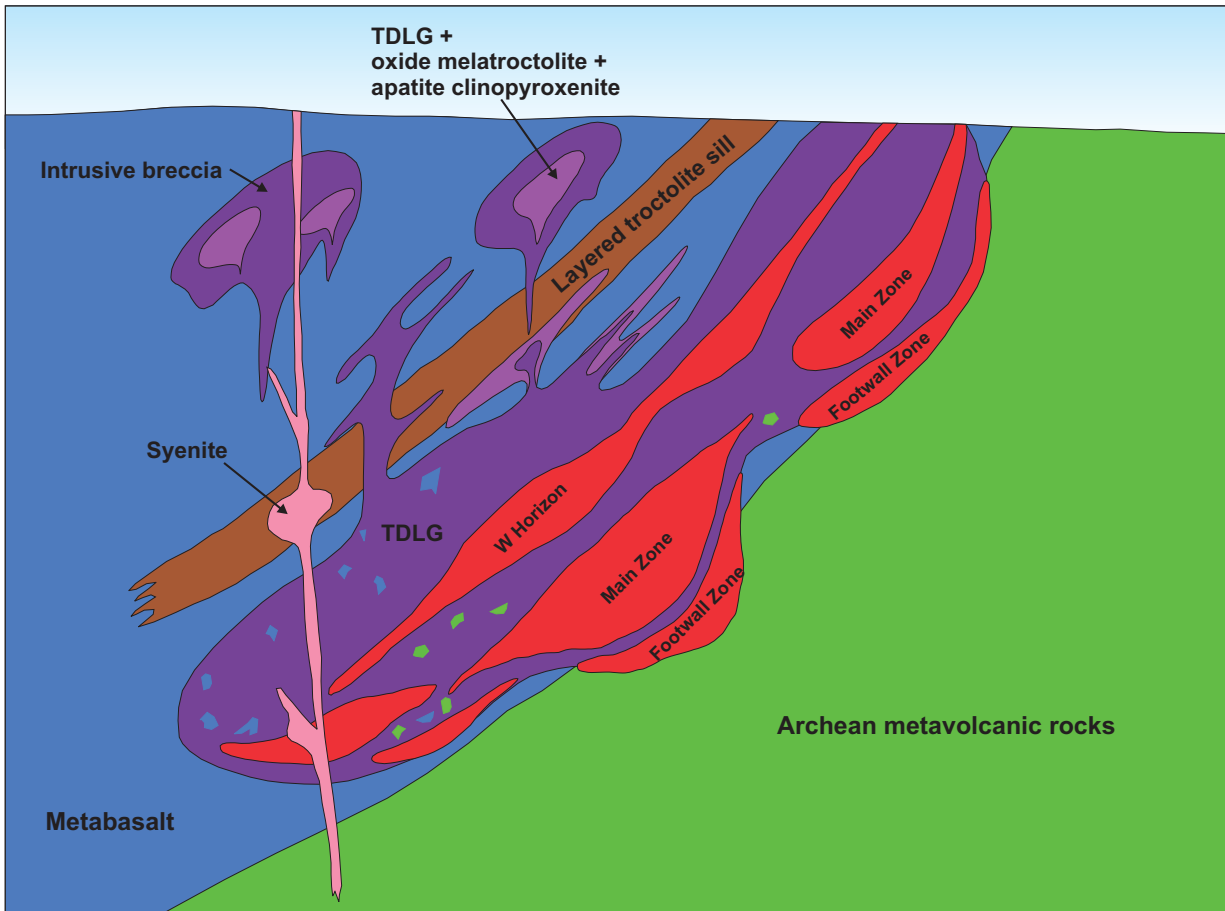

**Figure DR4:** A schematic cross section of the Marathon deposit showing the stratigraphic distribution of three different mineralized zones and their relationship.

## References

- Good, D.J., Epstein, R., McLean, K., Linnen, R.L., and Samson, I.M., 2015, Evolution of the main zone at the Marathon Cu-PGE sulfide deposit, Midcontinent rift, Canada: Spatial relationships in a magma conduit setting: *Economic Geology*, v. 110, no. 4, p. 983–1008.
- Heaman, L., and Machado, N., 1992, Timing and origin of midcontinent rift alkaline magmatism, North America: evidence from the Coldwell Complex: *Contributions to Mineralogy and Petrology*, v. 110, p. 289–303.
- Mulja, T., and Mitchell, R.H., 1991, The Geordie Lake intrusion, Coldwell Complex, Ontario: A



palladium-and tellurium-rich disseminated sulfide occurrence derived from an evolved tholeiitic magma: *Economic Geology*, v. 86, p. 1050–1069.

Ono, S., Wing, B., Rumble, D., and Farquhar, J., 2006, High precision analysis of all four stable isotopes of sulfur ( $^{32}\text{S}$ ,  $^{33}\text{S}$ ,  $^{34}\text{S}$  and  $^{36}\text{S}$ ) at nanomole levels using a laser fluorination isotope-ratio-monitoring gas chromatography–mass spectrometry: *Chemical Geology*, v. 225, no. 1-2, p. 30–39.

Shahabi Far, M., 2016, The magmatic and volatile evolution of gabbros hosting the Marathon PGE-Cu deposit: evolution of a conduit system [Ph.D. Thesis]: Windsor, Ontario, Canada, University of Windsor, 260 p.

Walker, E.C., Sutcliffe, R.H., Shaw, C.S.J., Shore, G.T., and Penczak, R.S., 1993, Precambrian geology of the Coldwell Alkaline Complex: Ontario Geological Survey Open File Report 5868, 30p.

**TABLE DR1. CHARACTERISTICS OF MINERALIZED ZONES COMPRISING THE MARATHON PGE-CU DEPOSIT**

(GOOD ET AL., 2015)

| <b>Mineralized zone</b>     | <b>Sulfide occurrence</b>                                     | <b>PGE grade<br/>(ppm)</b> | <b>S content<br/>(ppm)</b> | <b>Cu/Pd</b>    |
|-----------------------------|---------------------------------------------------------------|----------------------------|----------------------------|-----------------|
| <i><b>Footwall Zone</b></i> | Semi-massive to net-textured magmatic                         | <~1                        | Up to 20000 to 30000       | > 6000 to 35000 |
| <i><b>Main Zone</b></i>     | Disseminated magmatic and replacing primary magmatic sulfides | <1 to 3                    | 500 to 10000               | 1000 to 20000   |
| <i><b>W Horizon</b></i>     | Disseminated                                                  | ~1 to 70                   | 500 to 4000                | ~ 10 to 1000    |

**TABLE DR2. LIST OF SELECTED SAMPLES FOR SULFUR ISOTOPE ANALYSES  
USING SIMS AND IRMS FROM THE MARATHON DEPOSIT**

| Sample No.     | Drill hole No. | Depth<br>(m) | GPS coordinate <sup>#</sup> |          | Zones                                |
|----------------|----------------|--------------|-----------------------------|----------|--------------------------------------|
|                |                |              | Northing                    | Easting  |                                      |
| 59375          | M-07-306       | 153.92       | 5404392.8                   | 550045.8 | W Horizon                            |
| 59385          | M-07-306       | 203.85       | 5404392.8                   | 550045.8 | Main Zone                            |
| 59415C         | M-07-306       | 155.60       | 5404392.8                   | 550045.8 | W Horizon                            |
| 59395b         | M-05-077       | 138.20       | 5404398.7                   | 550264.4 | Footwall Zone                        |
| G11-1I         | G-11           | 119.00       | 5405790.0                   | 550550.8 | Footwall Zone                        |
| G11-2          | G-11           | 50.00        | 5405790.0                   | 550550.8 | Above the Main<br>Zone               |
| G11-3          | G-11           | 80.00        | 5405790.0                   | 550550.8 | Main Zone                            |
| G11-7I         | G-11           | 84.00        | 5405790.0                   | 550550.8 | Main Zone                            |
| G11-8I         | G-11           | 80.00        | 5405790.0                   | 550550.8 | Main Zone                            |
| M05-94-195.6-1 | M-05-94        | 195.60       | 5405276.0                   | 550448.3 | Footwall Zone                        |
| M07-417-318.55 | M-07-417       | 318.55       | 5405275.0                   | 550300.0 | Footwall Zone                        |
| M08-468-129.35 | M-08-468       | 129.35       | 5404200.0                   | 550550.0 |                                      |
| M11-514-449.65 | M-11-514       | 449.65       | 5405197.0                   | 550096.9 | Footwall and Main<br>Zone transition |
| M11-514-450.43 | M-11-514       | 450.43       | 5405197.0                   | 550096.9 | Footwall and Main<br>Zone transition |
| M11-514-483.64 | M-11-514       | 483.64       | 5405197.0                   | 550096.9 | Footwall and Main<br>Zone transition |
| M08-437-171.71 | M-08-437       | 171.71       | 5404575.0                   | 550325.0 | Archean rocks                        |
| M09-480-59.22  | M-09-480       | 59.22        | 5404794.0                   | 550585.3 | Footwall Zone                        |
| M11-499-22.86  | M-11-499       | 22.86        | 5404029.0                   | 550193.5 | W Horizon                            |
| Ma168          | N.A.*          | N.A.*        | 5405470.0                   | 550683.0 | Main Zone                            |
| MSH54-2        | N.A.*          | N.A.*        | 5403591.0                   | 549810.0 | W Horizon                            |

\*N.A.= not applicable  
<sup>#</sup> GPS coordinates are NAD27 zone 16

**TABLE DR3. SULFUR ISOTOPE COMPOSITION ( $\delta^{34}\text{S}$ ) OF THE MARATHON DEPOSIT BY SIMS**

| Sample No      | Distance from basal contact | Zone            | Texture                          | Mineral | $\delta^{34}\text{S}$ (‰) | SEM (‰) | $^{34}\text{S}/^{32}\text{S}$ (meas) | 2SD      |
|----------------|-----------------------------|-----------------|----------------------------------|---------|---------------------------|---------|--------------------------------------|----------|
| G11-1I         | 0.00                        | Footwall        | Massive- sulfide                 | Po      | 0.4                       | 0.15    | 0.043416                             | 0.000115 |
| G11-1I         | 0.00                        | Footwall        | Massive- sulfide                 | Po      | 0.6                       | 0.14    | 0.043427                             | 0.000108 |
| G11-1I         | 0.00                        | Footwall        | Massive- sulfide                 | Po      | 0.9                       | 0.18    | 0.043437                             | 0.000129 |
| G11-1I         | 0.00                        | Footwall        | Massive- sulfide                 | Ccp     | 1.6                       | 0.21    | 0.043578                             | 0.000155 |
| G11-1I         | 0.00                        | Footwall        | Massive- sulfide                 | Ccp     | 0.2                       | 0.19    | 0.043514                             | 0.000140 |
| M05-94-195.6-1 | 0.00                        | Footwall        | Massive- sulfide                 | Po      | 1.2                       | 0.19    | 0.043451                             | 0.000146 |
| M05-94-195.6-1 | 0.00                        | Footwall        | Massive- sulfide                 | Ccp     | -0.4                      | 0.21    | 0.043491                             | 0.000154 |
| M05-94-195.6-1 | 0.00                        | Footwall        | Massive- sulfide                 | Ccp     | 0.2                       | 0.20    | 0.043517                             | 0.000148 |
| G11-2          | 67.81                       | Above Main Zone | Magmatic equilibrium             | Po      | 0.8                       | 0.19    | 0.043436                             | 0.000142 |
| G11-2          | 67.81                       | Above Main Zone | Magmatic equilibrium             | Po      | 0.8                       | 0.24    | 0.043432                             | 0.000183 |
| G11-2          | 67.81                       | Above Main Zone | Magmatic equilibrium             | Ccp     | -0.1                      | 0.16    | 0.043501                             | 0.000121 |
| G11-2          | 67.81                       | Above Main Zone | Magmatic equilibrium             | Ccp     | 0.2                       | 0.19    | 0.043514                             | 0.000140 |
| G11-3          | 37.81                       | Main Zone       | Magmatic equilibrium             | Po      | -0.2                      | 0.17    | 0.043389                             | 0.000131 |
| G11-3          | 37.81                       | Main Zone       | Magmatic equilibrium             | Ccp     | 0.7                       | 0.13    | 0.043538                             | 0.000098 |
| G11-3          | 37.81                       | Main Zone       | Magmatic equilibrium             | Ccp     | -0.2                      | 0.16    | 0.043500                             | 0.000121 |
| G11-3          | 37.81                       | Main Zone       | Magmatic equilibrium             | Ccp     | 1.1                       | 0.20    | 0.043556                             | 0.000147 |
| G11-3          | 37.81                       | Main Zone       | Magmatic equilibrium             | Ccp     | 0.5                       | 0.14    | 0.043530                             | 0.000105 |
| G11-3          | 37.81                       | Main Zone       | Intergrown with hydrous minerals | Ccp     | 0.5                       | 0.15    | 0.043528                             | 0.000115 |
| G11-3          | 37.81                       | Main Zone       | Magmatic equilibrium             | Ccp     | 0.0                       | 0.25    | 0.043506                             | 0.000184 |
| G11-7I         | 33.81                       | Main Zone       | Ccp* replacing Po <sup>#</sup>   | Po      | -0.2                      | 0.14    | 0.043392                             | 0.000106 |
| G11-7I         | 33.81                       | Main Zone       | Ccp replacing Po                 | Po      | 0.5                       | 0.15    | 0.043419                             | 0.000105 |
| G11-7I         | 33.81                       | Main Zone       | Ccp replacing Po                 | Po      | 0.2                       | 0.15    | 0.043405                             | 0.000109 |
| G11-7I         | 33.81                       | Main Zone       | Ccp replacing Po                 | Ccp     | 1.2                       | 0.16    | 0.043561                             | 0.000123 |

|                |       |                                   |                                  |     |      |      |          |          |
|----------------|-------|-----------------------------------|----------------------------------|-----|------|------|----------|----------|
| G11-7I         | 33.81 | Main Zone                         | Intergrown with hydrous minerals | Ccp | 0.5  | 0.20 | 0.043527 | 0.000151 |
| G11-7I         | 33.81 | Main Zone                         | Ccp replacing Po                 | Ccp | 0.4  | 0.18 | 0.043527 | 0.000133 |
| G11-7I         | 33.81 | Main Zone                         | Along plagioclase twinning       | Ccp | -0.3 | 0.18 | 0.043493 | 0.000133 |
| G11-8I         | 37.81 | Main Zone                         | Ccp replacing Po                 | Po  | -0.3 | 0.14 | 0.043388 | 0.000103 |
| G11-8I         | 37.81 | Main Zone                         | Ccp replacing Po                 | Po  | -0.2 | 0.17 | 0.043392 | 0.000128 |
| G11-8I         | 37.81 | Main Zone                         | Along plagioclase twinning       | Ccp | -0.3 | 0.13 | 0.043496 | 0.000097 |
| G11-8I         | 37.81 | Main Zone                         | Ccp replacing Po                 | Ccp | -0.2 | 0.21 | 0.043501 | 0.000154 |
| G11-8I         | 37.81 | Main Zone                         | Intergrown with hydrous minerals | Ccp | -0.4 | 0.18 | 0.043489 | 0.000138 |
| G11-8I         | 37.81 | Main Zone                         | Intergrown with hydrous minerals | Ccp | -0.4 | 0.19 | 0.043490 | 0.000142 |
| G11-8I         | 37.81 | Main Zone                         | Magmatic equilibrium             | Ccp | 0.1  | 0.16 | 0.043510 | 0.000120 |
| M11-514-449.65 | 6.85  | Footwall and Main Zone transition | Intergrown with hydrous minerals | Po  | 0.2  | 0.14 | 0.043405 | 0.000107 |
| M11-514-449.65 | 6.85  | Footwall and Main Zone transition | Ccp replacing Po                 | Po  | 0.6  | 0.28 | 0.043425 | 0.000201 |
| M11-514-449.65 | 6.85  | Footwall and Main Zone transition | Intergrown with hydrous minerals | Po  | -0.3 | 0.16 | 0.043387 | 0.000119 |
| M11-514-449.65 | 6.85  | Footwall and Main Zone transition | Intergrown with hydrous minerals | Po  | -0.1 | 0.20 | 0.043395 | 0.000144 |
| M11-514-449.65 | 6.85  | Footwall and Main Zone transition | Intergrown with hydrous minerals | Po  | 0.3  | 0.19 | 0.043413 | 0.000139 |
| M11-514-449.65 | 6.85  | Footwall and Main Zone transition | Intergrown with hydrous minerals | Ccp | 0.1  | 0.23 | 0.043511 | 0.000170 |
| M11-514-449.65 | 6.85  | Footwall and Main Zone transition | Ccp replacing Po                 | Ccp | -0.3 | 0.21 | 0.043494 | 0.000153 |

|                |        |                                   |                                  |                  |      |      |          |          |
|----------------|--------|-----------------------------------|----------------------------------|------------------|------|------|----------|----------|
| M11-514-449.65 | 6.85   | Footwall and Main Zone transition | Intergrown with hydrous minerals | Ccp              | 1.6  | 0.20 | 0.043575 | 0.000128 |
| MSH54-2        | N.D.** | W Horizon                         | Intergrown with hydrous minerals | Ccp              | -0.7 | 0.20 | 0.043475 | 0.000149 |
| MSH54-2        | N.D.** | W Horizon                         | Ccp replacing Po                 | Ccp              | 0.7  | 0.18 | 0.043536 | 0.000136 |
| MSH54-2        | N.D.** | W Horizon                         | Magmatic equilibrium             | Ccp              | -1.1 | 0.17 | 0.043458 | 0.000127 |
| MSH54-2        | N.D.** | W Horizon                         | Magmatic equilibrium             | Ccp              | -1.5 | 0.19 | 0.043442 | 0.000143 |
| MSH54-2        | N.D.** | W Horizon                         | Intergrown with hydrous minerals | Ccp              | -1.0 | 0.18 | 0.043462 | 0.000134 |
| 59375          | 90.93  | W Horizon                         | Magmatic equilibrium             | Ccp              | -0.4 | 0.23 | 0.043489 | 0.000174 |
| 59375          | 90.93  | W Horizon                         | Magmatic equilibrium             | Ccp              | -0.5 | 0.14 | 0.043485 | 0.000107 |
| 59375          | 90.93  | W Horizon                         | Magmatic equilibrium             | Ccp              | 0.2  | 0.19 | 0.043515 | 0.000139 |
| 59375          | 90.93  | W Horizon                         | Magmatic equilibrium             | Ccp              | 0.8  | 0.18 | 0.043540 | 0.000133 |
| M08-468-129.35 | 0.00   | Footwall Archean metavolcanic-1   | Magmatic equilibrium             | Py <sup>##</sup> | -2.6 | 0.18 | 0.043365 | 0.000132 |
| M08-468-129.35 | 0.00   | Footwall Archean metavolcanic-1   | Magmatic equilibrium             | Py               | -2.0 | 0.21 | 0.043388 | 0.000155 |
| M08-468-129.35 | 0.00   | Footwall Archean metavolcanic-1   | Magmatic equilibrium             | Py               | -2.6 | 0.18 | 0.043362 | 0.000132 |
| M08-437-171.71 | 0.00   | Footwall Archean metavolcanic-2   | Magmatic equilibrium             | Py               | 4.7  | 0.18 | 0.043681 | 0.000134 |
| M08-437-171.71 | 0.00   | Footwall Archean metavolcanic-2   | Magmatic equilibrium             | Py               | 3.4  | 0.19 | 0.043623 | 0.000146 |
| G11-3          | 37.81  | Main Zone                         | Magmatic equilibrium             | Py               | 1.4  | 0.19 | 0.043535 | 0.000137 |
| G11-3          | 37.81  | Main Zone                         | Magmatic equilibrium             | Py               | -0.5 | 0.16 | 0.043454 | 0.000115 |

\*Ccp= chalcopyrite

#Po= pyrrhotite

\*\*N.D.= not determined

##Py= pyrite

**TABLE DR4. MULTIPLE SULFUR ISOTOPE DATA FROM THE MARATHON DEPOSIT BY IRMS**

| Samples        | Zone                                 | Mineral          | Textures                            | Minimum distance<br>from basal contact | $\delta^{33}\text{S}$<br>(‰) | $\delta^{34}\text{S}$<br>(‰) | $\delta^{36}\text{S}$<br>(‰) | $\Delta^{33}\text{S}$<br>(‰) | $\Delta^{36}\text{S}$<br>(‰) | Cu/Pd  |
|----------------|--------------------------------------|------------------|-------------------------------------|----------------------------------------|------------------------------|------------------------------|------------------------------|------------------------------|------------------------------|--------|
| M07-417-318.55 | Footwall Zone                        | Po               | Massive to semi-massive             | 0.00                                   | 0.06                         | 1.9                          | 4.45                         | -0.91                        | 0.88                         | 13351  |
| M07-417-318.55 | Footwall Zone                        | Ccp              | Massive to semi-massive             | 0.00                                   | 0.16                         | 2.0                          | 4.64                         | -0.88                        | 0.80                         | 13351  |
| 59395b         | Footwall Zone                        | Po <sup>*</sup>  | Massive to semi-massive             | 0.17                                   | 0.27                         | 2.2                          | 5.15                         | -0.88                        | 0.90                         | 7474   |
| 59395b         | Footwall Zone                        | Ccp <sup>#</sup> | Massive to semi-massive             | 0.17                                   | -1.04                        | -0.5                         | -0.10                        | -0.76                        | 0.92                         | 7474   |
| M11-514-450.43 | Footwall and Main<br>Zone transition | Po               | Magmatic equilibrium                | 6.07                                   | 0.25                         | 1.9                          | 4.21                         | -0.71                        | 0.66                         | 10172  |
| M11-514-483.64 | Footwall and Main<br>Zone transition | Po               | Magmatic equilibrium                | 12.44                                  | -0.13                        | 1.4                          | 3.44                         | -0.84                        | 0.80                         | 8301   |
| M11-514-483.64 | Footwall and Main<br>Zone transition | Ccp              | Magmatic equilibrium                | 12.44                                  | 0.00                         | 1.6                          | 3.89                         | -0.84                        | 0.81                         | 8301   |
| G11-7I         | Main Zone                            | Po               | Ccp replacing Po                    | 25.00                                  | 0.50                         | 1.3                          | 2.94                         | -0.19                        | 0.39                         | 1740   |
| G11-7I         | Main Zone                            | Ccp              | Ccp replacing Po                    | 25.00                                  | 0.52                         | 1.4                          | 2.87                         | -0.18                        | 0.28                         | 1740   |
| 59385          | Main Zone                            | Ccp              | Intergrown with hydrous<br>minerals | 40.98                                  | 0.37                         | 1.2                          | 2.51                         | -0.22                        | 0.32                         | 3984   |
| Ma168          | Main Zone                            | Po               | Intergrown with hydrous<br>minerals | 68.00                                  | 0.74                         | 1.5                          | 2.98                         | -0.04                        | 0.08                         | N.D.** |
| Ma168          | Main Zone                            | Ccp              | Intergrown with hydrous<br>minerals | 68.00                                  | 0.78                         | 1.7                          | 3.19                         | -0.07                        | 0.06                         | N.D.** |
| M11-499-22.86  | W Horizon                            | Ccp              | Disseminated                        | 60.00                                  | 0.51                         | 1.0                          | 1.72                         | 0.00                         | -0.16                        | 847    |
| 59415C         | W Horizon                            | Ccp              | Disseminated                        | 70.00                                  | 0.23                         | 0.6                          | 1.11                         | -0.06                        | 0.04                         | 166    |

<sup>\*</sup>Po= pyrrhotite  
<sup>#</sup>Ccp= chalcopyrite  
<sup>\*\*</sup>N.D.= not determined
